# Supplementary material for: Effects of NO 2 and C 3 H 6 on the heterogeneous oxidation of SO 2 on TiO 2 in the presence or absence of UV irradiation
Source: Copernicus journal article supplement (doi:10.5194/acp-2019-532), 2019-07-12
Supplement: Supplementary file [file acp-2019-532-AC1-supplement.zip]

## Supplemental Information

### Effects of NO<sub>2</sub> and C<sub>3</sub>H<sub>6</sub> on the heterogeneous oxidation of SO<sub>2</sub> on TiO<sub>2</sub> in the presence or absence of UV irradiation

5 Biwu Chu<sup>1, 2, 3</sup>, Yali Wang<sup>1, 3</sup>, Weiwei Yang<sup>1, 3, 4</sup>, Jinzhu Ma<sup>1, 2, 3</sup>, Qingxin Ma<sup>1, 2, 3, \*</sup>, Peng Zhang<sup>1</sup>,  
Yongchun Liu<sup>1, 5</sup>, Hong He<sup>1, 2, 3</sup>

<sup>1</sup> State Key Joint Laboratory of Environment Simulation and Pollution Control, Research Center for Eco-Environmental Sciences, Chinese Academy of Sciences, Beijing 100085, China

10 <sup>2</sup> Center for Excellence in Regional Atmospheric Environment, Institute of Urban Environment, Chinese Academy of Sciences, Xiamen 361021, China

<sup>3</sup> University of Chinese Academy of Sciences, Beijing 100049, China

<sup>4</sup> Key Laboratory of Pesticide and Chemical Biology of Ministry of Education, Institute of Environmental and Applied Chemistry, College of Chemistry, Central China Normal University, Wuhan 430079, China

15 <sup>5</sup> Aerosol and Haze Laboratory, Beijing Advanced Innovation Center for Soft Matter Science and Engineering, Beijing University of Chemical Technology, Beijing 100029, China

Correspondence to: Qingxin Ma ([qxma@rcees.ac.cn](mailto:qxma@rcees.ac.cn))

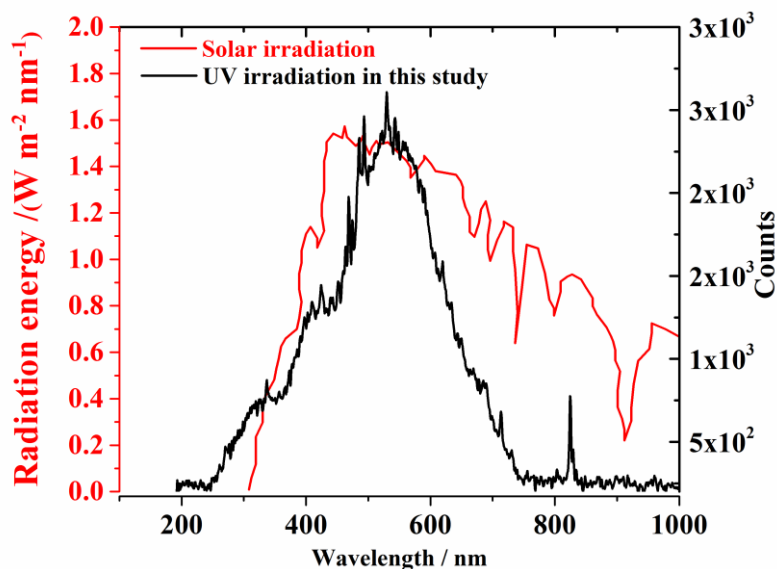

Figure S1: The spectrum of solar irradiation on the earth surface and the spectrum of the UV-Vis irradiation in this study.

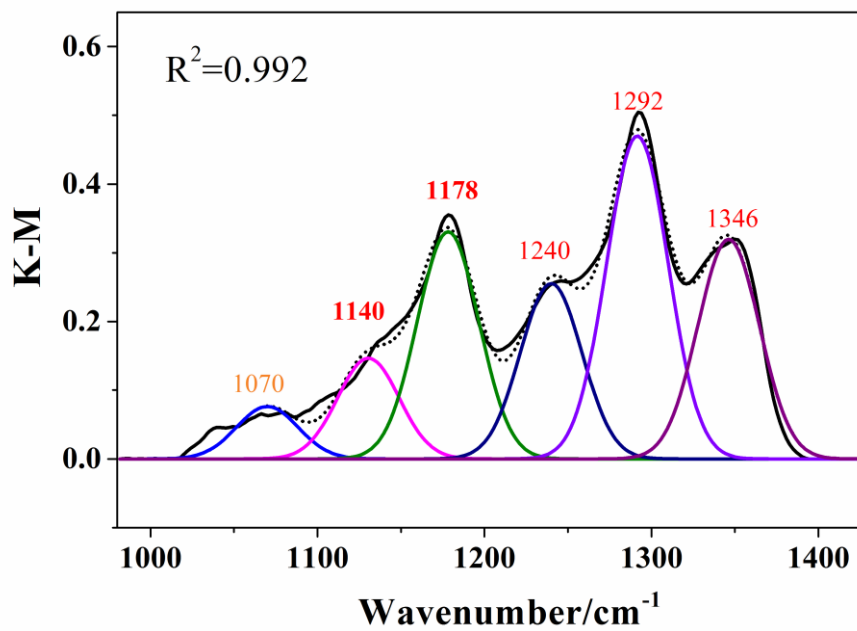

Figure S2: Peak fit of DRIFTS spectrum in the range of 1000-1400 cm<sup>-1</sup> for the last spectrum in Figure 1(b).
